# Supplementary material for: Deciphering the Effect of Light Wavelengths in Monilinia spp. DHN-Melanin Production and Their Interplay with ROS Metabolism in M. fructicola
Source: MDPI journal article supplement (doi:10.3390/jof9060653), 2023-06-10
Supplement: s1 [file s1]

**Supplementary Table S2.** Real-time PCR primer set (including target gene, primer name, primer sequence, and its source) to assess the expression pattern of the selected genes.

| Target gene  | Primer name | Primer sequences (5' - 3') | Source |
|--------------|-------------|----------------------------|--------|
| <i>PKS12</i> | PKS12- Fw   | TGCTACCAACCACTCAGCAG       | [16]   |
|              | PKS12- Rv   | TTGGGATCAACACCCGCATT       |        |
| <i>PKS13</i> | PKS13- Fw   | GCCTACGAGGCCATGGAAAT       | [16]   |
|              | PKS13- Rv   | TCGATGTCTTGAGCAGCGTT       |        |
| <i>SMR1</i>  | SMR1- Fw    | CCATTACCCGGTGGTGTTC        | [16]   |
|              | SMR1- Rv    | GCATATCTGCTGGCACATGG       |        |
| <i>YGH1</i>  | YGH1- Fw    | CGAGCAGCTTGTGTCTATCG       | [16]   |
|              | YGH1- Rv    | TTTGGGCTTCCCATGCCTT        |        |
| <i>BRN1</i>  | BRN1- Fw    | GGATCTGGCCAAGGTATCGG       | [16]   |
|              | BRN1- Rv    | ATGTCCCCTGGGACTGCTAT       |        |
|              | BRN1- Fw    | CCGAACCGACATGTACCACA       | [16]   |
|              | BRN1- Rv    | GCGACCAAGTGCAAGCATAC       |        |
| <i>BRN2</i>  | BRN2- Fw    | CCAATATGTCCGGCGTACCA       | [16]   |
|              | BRN2- Rv    | AGCGATACCGTTGCAAGTGA       |        |
| <i>SCD1</i>  | SCD1- Fw    | GACTACACCACCATCGGCAA       | [16]   |
|              | SCD1- Rv    | CGCCGAGAAGATGTTGGGTT       |        |
| <i>ZTF1</i>  | ZTF1- Fw    | TCCCAACAATGCTCGTCGAAT      | [16]   |
|              | ZTF1- Rv    | GGTACGCAGCAGCCATACTC       |        |

|      |           |                       |                             |
|------|-----------|-----------------------|-----------------------------|
| ZTF2 | ZTF2- Fw  | TGTCGAGCTTTGGATGGCTAC | [16]                        |
|      | ZTF2- Rv  | TGAGCCATGCGGTACATCTTA |                             |
|      |           |                       |                             |
| NOXA | NOX A- Fw | GAAGGATGGCGTTGGGAACT  | Vall-llaura,<br>unpublished |
|      | NOX A- Rv | TGACGAACGACTCGAACGAT  |                             |
|      |           |                       |                             |
| NOXB | NOX B- Fw | TGGTGCCGGTATTGGTGTTA  | Vall-llaura,<br>unpublished |
|      | NOX B- Rv | TCTTGAGCTTCGATTGCGAGT |                             |
|      |           |                       |                             |
| NOXR | NOX R- Fw | AGATCCGTGAACGTGACGAC  | Vall-llaura,<br>unpublished |
|      | NOX R- Rv | TGATTCGGATCTTCGGCTGG  |                             |
|      |           |                       |                             |
| PLS1 | PLS1-Fw   | CATCTGGTTCGGGACGCTC   | Vall-llaura,<br>unpublished |
|      | PLS1-Rv   | CACCCCGGCATCGTCG      |                             |
|      |           |                       |                             |
| SOD1 | SOD1-Fw   | GTGACAACACCAACGGCTGC  | This study                  |
|      | SOD1-Rv   | GGACCTCATCGGTGGGAGCAC |                             |
|      |           |                       |                             |
| SOD2 | SOD2-Fw   | GCAACCATCCCCGAAGACAA  | This study                  |
|      | SOD2-Rv   | TGTGGGGAGGTTGGAGAATTG |                             |
|      |           |                       |                             |
| SOD3 | SOD3-Fw   | ATCTAGCAGGTTCGCCATTCC | This study                  |
|      | SOD3-Rv   | GACGCAAAGAATTGGCGTGA  |                             |
|      |           |                       |                             |
| CAT2 | CAT2-Fw   | ACGCGATGTTTCATGGCTTTG | This study                  |
|      | CAT2-Rv   | CGTCCATGTGACGGAATGAC  |                             |
|      |           |                       |                             |
| CAT4 | CAT4-Fw   | CTCATGGGTGATCGCGGTAT  | This study                  |
|      | CAT4-Rv   | CGTAGTCGGGTGACTTCTCG  |                             |

|                                |                   |                      |            |
|--------------------------------|-------------------|----------------------|------------|
| <i>APX</i>                     | APX-Fw            | CCAGGTCGTCAAGACAAGGA | This study |
|                                | APX-Rv            | ATCAGTGTGGCAACGACCAA |            |
| <hr/>                          |                   |                      |            |
| <i>LCC</i>                     | LCC-Fw            | TTCCCTTGGGGATCGTTGAC | This study |
|                                | LCC-Rv            | AAGTGGCCCTGGATATTGCC |            |
| <hr/>                          |                   |                      |            |
| <i>EF1-<math>\alpha</math></i> | EF1- $\alpha$ -Fw | CTGAGTACCCACCTCTCGGA | [3]        |
|                                | EF1- $\alpha$ -Rv | ACCGGCCTTTTCTTGCTTCT |            |
