# Supplementary material for: Deciphering the Effect of Light Wavelengths in Monilinia spp. DHN-Melanin Production and Their Interplay with ROS Metabolism in M. fructicola
Source: MDPI journal article supplement (doi:10.3390/jof9060653), 2023-06-10
Supplement: s1 [file s1]

**Supplementary Table S1.** DHN-melanin related genes from *Monilinia* spp., and ROS-related genes from *M. fructicola*. Melanin genes were retrieved from our previous study [16]. Genes related to ROS were identified in the *M. fructicola* genome after a BLAST analysis using genes from *B. cinerea* and *M. laxa* as query sequences. Gene names and their corresponding gene IDs are specified.

| Gene         | Full gene name                                               | ID Query sequence | ID Query sequence                                                                                                |
|--------------|--------------------------------------------------------------|-------------------|------------------------------------------------------------------------------------------------------------------|
| <b>PKS12</b> | POLYKETIDE<br>SYNTHASE- 12                                   | Bcin02g08770      | <i>M. laxa</i> : Monilinia__049320<br><i>M. fructicola</i> : MFRU_042g00180.1<br><i>M. fructigena</i> : g3016.t1 |
| <b>PKS13</b> | POLYKETIDE<br>SYNTHASE- 13                                   | Bcin03g08050      | <i>M. laxa</i> : Monilinia__009450<br><i>M. fructicola</i> : MFRU_053g00290.1<br><i>M. fructigena</i> : g3467.t1 |
| <b>SMR1</b>  | SCLEROTIAL<br>MELANOGENESIS<br>REGULATORY GENE- 1            | Bcin02g08760.1    | <i>M. laxa</i> : Monilinia__009400<br><i>M. fructicola</i> : MFRU_053g00340.1<br><i>M. fructigena</i> : g3472.t1 |
| <b>YGH1</b>  | YELLOWISH-GREEN<br>HYDROLASE- 1                              | Bcin02g04360.1    | <i>M. laxa</i> : Monilinia__012010<br><i>M. fructicola</i> : MFRU_030g00600.1<br><i>M. fructigena</i> : g3325.t1 |
| <b>BRN1</b>  | BROWN 1                                                      | Bcin03g08100      | <i>M. laxa</i> : Monilinia__025870<br><i>M. fructicola</i> : MFRU_016g00660.1<br><i>M. fructigena</i> : g3016.t1 |
| <b>BRN2</b>  | BROWN 2                                                      | Bcin04g04800      | <i>M. laxa</i> : Monilinia__009410<br><i>M. fructicola</i> : MFRU_053g00330.1<br><i>M. fructigena</i> : g3471.t1 |
| <b>SCD1</b>  | SCYTALONE<br>DEHYDRATASE- 1                                  | Bcin03g08110.1    | <i>M. laxa</i> : Monilinia__049320<br><i>M. fructicola</i> : MFRU_042g00180.1<br><i>M. fructigena</i> : g3016.t1 |
| <b>ZTF1</b>  | TRANSCRIPTION<br>FACTOR 1 (CLUSTERED<br>WITH PKS12 OR PKS13) | Bcin03g08090      | <i>M. laxa</i> : Monilinia__009420<br><i>M. fructicola</i> : MFRU_053g00320.1<br><i>M. fructigena</i> : g3470.t1 |
| <b>ZTF2</b>  | TRANSCRIPTION<br>FACTOR 2 (CLUSTERED<br>WITH PKS12 OR PKS13) | Bcin03g08080      | <i>M. laxa</i> : Monilinia__009430<br><i>M. fructicola</i> : MFRU_053g00310.1<br><i>M. fructigena</i> : g3469.t1 |
| <b>NOX A</b> | NADPH OXIDASE A                                              | XP_001550350.1    | <i>M. fructicola</i> : MFRU_002g00910.1                                                                          |
| <b>NOX B</b> | NADPH OXIDASE B                                              | XP_024547116.1    | <i>M. fructicola</i> : MFRU_056g00360.1                                                                          |
| <b>NOX R</b> | NADPH OXIDASE R                                              | XP_001555495.1    | <i>M. fructicola</i> : MFRU_027g00750.1                                                                          |
| <b>PLS1</b>  | TETRASPANIN                                                  | XP_001551733.2    | <i>M. fructicola</i> : MFRU_037g00190.1                                                                          |

|                    |                                         |                  |                                         |
|--------------------|-----------------------------------------|------------------|-----------------------------------------|
| <b><i>SOD1</i></b> | <i>SUPEROXIDE<br/>DISMUTASE 1</i>       | Bcin03g03390     | <i>M. fructicola</i> : MFRU_003g03910.1 |
| <b><i>SOD2</i></b> | <i>SUPEROXIDE<br/>DISMUTASE 2</i>       | Bcin_06g03160    | <i>M. fructicola</i> : MFRU_005g03090.1 |
| <b><i>SOD3</i></b> | <i>SUPEROXIDE<br/>DISMUTASE 3</i>       | Bcin01g03830     | <i>M. fructicola</i> : MFRU_009g02240.1 |
| <b><i>CAT2</i></b> | <i>CATALASE 2</i>                       | Bcin11g06450     | <i>M. fructicola</i> : MFRU_040g00100.1 |
| <b><i>CAT4</i></b> | <i>CATALASE 4</i>                       | Bcin05g00730     | <i>M. fructicola</i> : MFRU_002g00600.1 |
| <b><i>APX</i></b>  | <i>ASCORBATE<br/>PEROXIDASE</i>         | Bcin_01g09360    | <i>M. fructicola</i> : MFRU_021g00350.1 |
| <b><i>LCC</i></b>  | <i>MULTICOPPER<br/>OXIDASE, LACCASE</i> | Monilinia__03303 | <i>M. fructicola</i> : MFRU_009g01200.1 |
